1                   **Thermal Tolerance is linked with Virulence in a Fish Pathogen**

2

3

4 Roghaieh Ashrafi<sup>1,\*</sup>, Matthieu Bruneaux<sup>1</sup>, Lotta-Riina Sundberg<sup>1</sup>, Katja Pulkkinen<sup>2</sup>,  
5 Janne Valkonen<sup>1</sup>, Tarmo Ketola<sup>1</sup>

6 *<sup>1</sup>University of Jyväskylä, Centre of Excellence in Biological Interactions. Department of*  
7 *Biological and Environmental Science (and Nanoscience Center). P.O. Box 35. FI-40014*  
8 *University of Jyväskylä. FINLAND*

9 *<sup>2</sup>University of Jyväskylä, Department of Biological and Environmental Science. P.O. Box 35.*  
10 *FI-40014 University of Jyväskylä. FINLAND*

11 \*Corresponding author e-mail: [roghaieh.ashrafi@jyu.fi](mailto:roghaieh.ashrafi@jyu.fi)

12

13

14

15

16 Keywords: Virulence, thermal tolerance, environmentally growing opportunistic bacteria,  
17 thermal performance curves, climate change

18

19

20

21

22

23

24

25

26

27 ABSTRACT

28         Although increase in temperatures may boost the number of pathogens, a  
29 complex process involving the interaction of a susceptible host, a virulent strain, and  
30 environmental factors would influence disease virulence in unpredictable ways.  
31 Here we explored if the virulence of an environmentally growing opportunistic fish  
32 pathogen, *Flavobacterium columnare*, would be malleable to evolutionary changes via  
33 correlated selection on thermal tolerance. Virulence among the strains increased over  
34 years, but tolerance to higher temperatures was associated with reduced virulence.  
35 Our results suggest that observed increase in frequency of columnaris epidemics  
36 over the last decade is most likely associated with increased length of growing  
37 season, or other time dependent change in environment, rather than increased  
38 regional average temperatures. Our results also indicate that most virulent bacteria  
39 had weaker ability to tolerate outside host environments, which suggest trade-off  
40 between more obligate pathogen behaviour and ability to grow outside host.

41

42

43

44

45

46

47

48

49

50

51

52

53

54

55

56 INTRODUCTION

57 Climate projections suggest that changing climate not only affects the average  
58 temperature but also the occurrence of extreme and variable temperatures <sup>1</sup>. Such  
59 changes in climate alter extinction risks, provoke range shifts and cause selection  
60 pressure to favour genotypes that are adapted to cope with these new environments  
61 <sup>2-4</sup>. Microbes, many of which have the capacity to be or become pathogens, are  
62 expected to adapt rapidly. Global warming may benefit many bacterial species, since  
63 they will face milder winter months resulting in greater overwintering success,  
64 increased numbers of generations and, thus, higher pathogen densities to damage  
65 hosts <sup>5, 6</sup>. Environmentally growing opportunistic pathogens, in contrast to obligate  
66 (fully host-dependent) pathogens, can utilize outside host resources, making them  
67 very sensitive to selection pressures outside the host <sup>7</sup>. Therefore, predicting the  
68 effect of climate warming on environmental opportunistic bacteria with life cycles  
69 both outside and inside the host present a particular challenge because pathogen  
70 fitness in both environments may be differentially affected by temperature <sup>8</sup>.  
71 Although the ability to stay alive in the environment, e.g. as inactive spores, has  
72 been linked with high virulence <sup>9, 10</sup>, pathogens can also evolve towards a more  
73 benign virulence since investments in resource acquisition and defence in the  
74 outside-environments can trade off with traits connected to virulence <sup>11, 12</sup>. Previous  
75 studies suggest that higher temperatures select genotypes that tolerate hotter  
76 temperatures, whereas fluctuations in temperature should select for more generalist  
77 genotypes with improved tolerance to extreme temperatures <sup>13-18</sup>. Nevertheless, it  
78 has remained unclear how climate warming might affect growth parameters in  
79 environmentally growing opportunistic pathogens, and how this correlates with  
80 their potential to cause disease.

81 Understanding the selection pressures underlying the evolution of virulence in  
82 outside-host environments is crucial in the current context of climate change,  
83 especially for diseases affecting world food production. *Flavobacterium columnare*, the  
84 etiological agent of columnaris disease in farmed fish, is an opportunistic fish  
85 pathogen which severely impacts freshwater aquaculture worldwide <sup>19, 20</sup>.  
86 Specifically, this bacterium can cause infections both in cold and warm water fish

87 species<sup>21</sup>. The temperature range in which it can grow actively is approximately 15  
88 to 35°C<sup>19</sup>. Previous work on this bacterium in the context of global warming and  
89 even a number of virulent pathogens has focused mainly on long-term empirical  
90 data examining the relationship between mean ambient temperature and disease  
91 prevalence<sup>22, 23</sup>. Analysis of more than 20 years' worth of data has showed a  
92 significant positive effect of mean water temperature on the prevalence of  
93 columnaris disease at two fish farms<sup>22</sup>. However, it is still unclear if climate change  
94 will impact the thermal performance of this bacterium at long term by selecting  
95 more thermo-tolerant strains and if such changes may have any effect on bacterial  
96 virulence. This is important information for regions where climate change is  
97 expected to be most severe, such as Finland where average annual temperature is  
98 predicted to rise nearly twice as fast as the average temperature for the whole globe  
99<sup>24</sup>.

100 Thermal tolerance is usually depicted via thermal performance curves (TPC)  
101 composed from the measured performance of a genotype in different thermal  
102 environments. Assuming that thermal performance curves obtained from  
103 measurements done in constant environments can be used to predict how genotypes  
104 survive under fluctuations<sup>25-27</sup>, adaptation to fluctuating environments could occur  
105 either via overall elevated TPC or via broadened TPC<sup>16, 17, 28</sup>. The key  
106 ecophysiological parameters that characterize thermal performance curves are the  
107 critical thermal thresholds which represent the lower ( $CT_{min}$ ) and upper ( $CT_{max}$ )  
108 temperatures at which performance (e.g. growth or yield of bacteria) is zero, the  
109 optimum temperature ( $T_{opt}$ ) at which performance is maximal, and the maximum  
110 value of performance itself ( $\mu_{max}$ ). In addition to these parameters, variation in TPC  
111 can also be characterized using principal component analysis in order to identify the  
112 main patterns of performance variation among the genotypes<sup>29, 30</sup>. However, the  
113 latter method has been rarely applied to thermal performance data in bacteria.

114 In the present study, we measured bacterial growth at five different  
115 temperatures (spanning from 17 to 32 that matches typical summer growth season in  
116 Finland, and in the near future) in order to characterize the temperature dependence  
117 of maximum biomass (hereafter yield) in 49 *F. columnare* isolates collected across

118 Finland. Based on this data, we examined (i) variation of thermal performance in  
119 isolates, and (ii) the link between thermal performance and bacterial virulence, using  
120 virulence data measured in a separate experiment. We showed that Finnish isolates  
121 differed in maximum yield and limits of thermal range, and that their good tolerance  
122 to high temperatures was linked to lowered virulence.

123

124

## 125 MATERIAL AND METHODS

126

### 127 *F. columnare* strains and culture conditions

128

129 We used 49 Finnish *F. columnare* isolates for which genotypes were previously  
130 determined by the conventional MLST method using six loci <sup>31</sup> (Supplementary  
131 Table 1). All strains, belonging to broadly defined genetic group characterized by  
132 good low-temperature tolerance (genomovar I) <sup>31, 32</sup>, were originally isolated from  
133 eight fish farms, from both Southern (approx. 65° N) and Northern (62°N) parts of  
134 Finland (Supplementary Table 1), from fish or tank water using standard culture  
135 methods with modified Shieh medium <sup>33</sup>, Shieh medium supplemented with  
136 tobramycin <sup>34</sup>, or AO-agar <sup>35</sup>.

137

### 138 *Thermal performance measurements*

139

140 Bacterial isolates were grown overnight in modified Shieh medium under  
141 constant agitation (120 rpm) in room temperature and further sub-cultured to fresh  
142 medium in ratio of 1:10 for another 16-18 h under the same conditions. Sterile 15 ml  
143 tubes containing 5.5 ml of bacterial culture were centrifuged for 5 min in 4°C at 3500  
144 g, after which the supernatant was discarded. 240 µl of concentrated bacterial culture  
145 was mixed with 60 µl of 10% of glycerol and 10% of fetal calf serum mixture on 100-  
146 well Bioscreen C® plate in a randomized order and stored at -80°C. Prior to growth  
147 measurements, bacterial isolates were inoculated to a new Bioscreen plate containing  
148 400 µl fresh modified Shieh medium in each well directly from the frozen Bioscreen  
149 plate using heat-sterilized cryo-replicator (Enzyscreen B.V., Haarlem, Netherlands  
150 <sup>36</sup>). After 24 h incubation at 25°C, inoculums of 40 µL of individual bacterial strains  
151 from these pre-cultures were distributed into a Bioscreen plate containing 400 µL of

152 fresh modified Shieh medium in each well for the growth measurements. Growth  
153 experiments were run simultaneously in duplicate in two 100-well plates in a  
154 Bioscreen C spectrophotometer (Oy Growth Curves Ab Ltd, Finland) over two to  
155 eight days depending on the experimental temperature, at five different  
156 temperatures (17°, 20°, 22°, 29° and 32°C). The bacteria were cultured without  
157 shaking, and optical density (OD) measurements were performed at 5-minute  
158 intervals (absorbance at 600 nm). The growth curves were analysed as described in  
159 Ketola *et al.* <sup>16</sup> to estimate maximum growth rate and maximum biomass or yield.  
160 Maximum yield estimates were more robust than maximum growth estimates due to  
161 the sensitivity of the latter to noise in the early phase of the growth curves.  
162 Consequently, we chose to use maximum yield as a measure for strain performance  
163 at a given temperature.

164 Two alternative approaches were used to analyse the thermal  
165 performance data: (i) curve fitting followed by estimation of TPC parameters ( $CT_{min}$ ,  
166  $CT_{max}$ ,  $T_{opt}$ ,  $\mu_{max}$ ) for each strain and (ii) principal component analysis (PCA) on the  
167 discrete performance measurements.

168

#### 169 *Thermal performance curve fitting and parameter estimation*

170

171 We used the TableCurve 2D software (version 5.01; Systat Software, Inc. 2002)  
172 to select a set of 1960 candidate equations to describe the relationship between yield  
173 and temperature. Using data from a subset of experimental strains, all equations  
174 using two- and three-term functions, with intercept available in the TableCurve 2D  
175 library, were fitted and the resulting fits with large  $R^2$  values were visually  
176 inspected. Candidate equations were selected based on the fulfilment of the  
177 following criteria to ensure a biologically meaningful fit: (i) “bell-shaped” curve with  
178 maximum yield occurring within the experimental thermal range, (ii) mostly  
179 concave curve (i.e. curves with several and clear local maximums in the  
180 experimental thermal range were discarded, but slight bumps were allowed), (iii)  
181 extrapolation outside the experimental thermal range predicted decreased  
182 performance (i.e the behaviour of the curve outside the experimental thermal range  
183 was consistent with biological expectations). In the end, the following 6 equations

184 were chosen as candidates for a plausible model of the relationship between  
185 temperature (x) and performance (y):

186

187 1)  $y = a + b \cdot x^2 \cdot \log(x) + c \cdot x^3$

188 (2)  $y = a + b \cdot x + c \cdot x^2$

189 (3)  $y = a + b \cdot x^{\frac{3}{2}} + c \cdot x^2$

190 (4)  $y = \frac{1}{a+b \cdot \exp(x)+c \cdot \exp(-x)}$

191 (5)  $y = a + b \cdot x + c \cdot \log(x)^2 + d \cdot \sqrt{x}$

192 (6)  $y = a + b \cdot \log(x)^2 + c \cdot \log(x) + \frac{d \cdot \log(x)}{x},$

193

194 where a, b, c and d are strain-specific curve parameters. The average R<sup>2</sup> values across  
195 the 49 strains used in this study were greater than 0.98 for each of those equations.

196 For each strain, a weighted-average thermal performance curve was built after  
197 fitting those six candidate equations, where AIC values were used to calculate a  
198 strain-specific weight for each of the six equations according to the formula:

199

$$w_i = \frac{e^{-(\Delta AIC)_i/2}}{\sum_{j=1}^6 e^{-(\Delta AIC)_j/2}}$$

200

201 where  $w_i$  is the weight assigned to the  $i^{\text{th}}$  equation and  $(\Delta AIC)_i$  is the difference  
202 between the AIC of the  $i^{\text{th}}$  equation and the lowest AIC among the six equations for  
203 this strain. While acknowledging that our procedure for the selection of candidate  
204 equations might introduce some subjectivity in the choice of candidate curves,  
205 keeping 6 different candidate equations and producing a weighted-average model  
206 based on their AIC values allowed for a variety of shapes in the final fitted curves  
207 with an overall good quality of fit, as shown in Supplementary Figure 1.

208 The obtained average thermal performance curves were used to determine  
209 maximum performance  $\mu_{\text{max}}$  and optimal temperature  $T_{\text{opt}}$ . We decided not to  
210 extrapolate unreasonably the thermal performance curves to determine  $CT_{\text{min}}$   
211 values, but instead chose to estimate thermal ranges by calculating for each strain  
212 the temperatures at which its TPC reached half its maximum performance, hereafter  
213  $CT_{50/\text{low}}$  and  $CT_{50/\text{high}}$ . Growth at lower temperatures falls gradually and the growth  
214 in this species is already un-measurable at 15°C, causing estimation inaccuracy if  
215 curve fitting and in estimating CT min. Thermal performance breadth (TPB) was

216 defined as the difference between the estimated  $CT_{50/high}$  and  $CT_{50/low}$ . A visual  
217 inspection of the fitted curves was performed to remove  $CT_{50/low}$  (for 8 strains) and  
218  $T_{opt}$  values (for 3 strains) which were unreliable given the shape of the fit for a  
219 particular strain (e.g. very flat plateau at  $\mu_{max}$ , unreliable extrapolation for  $CT_{50/low}$ ),  
220 resulting in 41 strains with all TPC parameters.

221

### 222 *PCA on yield measurements*

223

224 Since PCA is sensitive to outlier data points departing from normal  
225 distributions, we visually inspected normal quantile-quantile plots of the yield data  
226 to identify and remove three outliers out of 49 strains prior to PCA. PCA was  
227 performed using the covariance matrix of maximum yields in five temperatures.  
228 Since the outliers were removed only to avoid unduly affecting the PCA by their  
229 departure from normality but were otherwise biologically meaningful, the  
230 coordinates of all 49 strains along each principal component (PC) were then  
231 calculated based on the PCA loadings obtained from the subset of 46 strains. In  
232 order to facilitate the biological interpretation of the patterns of variation described  
233 by each PC, we predicted the TPC of hypothetical strains located at the extreme  
234 boundaries of the 95% range of the coordinates of experimental strains along each  
235 PC using the inverse of the PCA matrix.

236

### 237 *Virulence assay*

238

239 A virulence experiment was conducted according to the Finnish Act on the  
240 Use of Animals for Experimental Purposes, under permission ESAVI-2010-  
241 05569/Ym-23 granted for L-RS by the National Animal Experiment Board at the  
242 Regional State Administrative Agency for Southern Finland. Virulence of the 49  
243 bacterial strains was assessed in an experiment using zebra fish (*Danio rerio*). The fish  
244 were infected using bacterial cultures grown overnight in fresh modified Shieh  
245 medium and adjusted at  $4 \times 10^5$  colony-forming units (CFU)  $mL^{-1}$ . Ten fish per  
246 bacterial strain were individually challenged in 500 ml of water by adding 500  $\mu l$  of  
247 adjusted bacterial culture directly into the experimental aquaria. The water  
248 temperature was maintained at  $25^\circ C$  during all experiments, which is close to the



249 mean  $T_{opt}$  of the strains used. It has been shown that the zebra fish can be used as a  
250 reliable model in virulence experiments since it shares the temperature optimum of  
251 this pathogen<sup>37</sup>. Aquaria containing fish were randomly placed on shelves in the  
252 experimental room to reduce the differences between aquaria. This infection method  
253 has been shown to produce a rapid onset of disease in fish, bringing out strain  
254 differences<sup>37, 38</sup>. As a control, 10 fish were individually exposed to 500  $\mu$ l of sterile  
255 Shieh medium. Disease signs and fish morbidity were monitored in two hour  
256 intervals for 97 hours. Morbid fish that had lost their natural swimming buoyancy,  
257 and which did not respond to external stimuli, were considered dead and removed  
258 from the experiment, and euthanatized by cutting the spinal cord to avoid the  
259 suffering of the fish. The experiment was conducted according to the Finnish Act on  
260 the Use of Animals for Experimental Purposes, under permission granted by the  
261 National Animal Experiment Board at the Regional State Administrative Agency for  
262 Southern Finland for L-RS.

263

#### 264 *Statistical analyses of thermal performance data*

265

266 The effects of MSLT genotype group (categorical variable, 4 levels), year of  
267 strain isolation (continuous variable) and geographical location (categorical variable,  
268 2 levels: Northern and Southern Finland) on thermal performance were assessed  
269 using model selection starting from a full linear model specified as:

270

$$271 \text{ Performance} = \text{intercept} + \beta_g \cdot \text{Group} + \beta_y \cdot \text{Year} + \beta_l \cdot \text{Location} + \text{residuals}$$

272

273 where Performance was either one of the thermal performance curve parameters  
274 estimated from curve fitting ( $\mu_{max}$ ,  $T_{opt}$ ,  $CT_{50/low}$ ,  $CT_{50/high}$  or TPB) or coordinates  
275 along one of the principal components of interest (PC1, PC2 or PC3). No interaction  
276 between Group and Year or Group and Location was included in the starting model  
277 due to the imbalanced distribution of strains from different MSLT genotype groups  
278 across the years or across the geographical range of our study. Model selection was  
279 performed iteratively: at each step, variables were dropped one at a time and the  
280 significance of the change in fit for each dropped variable was tested using a Chi-

281 square test (function *drop1* in R). If the highest p-value for significance of change in  
282 fit was greater than 0.10, the corresponding variable was dropped from the model  
283 and the next selection step was performed; otherwise model selection was stopped.

284

#### 285 *Statistical analyses of virulence data*

286

287 Since the vast majority of death events occurred early in the virulence assay,  
288 virulence data was analysed by considering fish survival as a binary variable  
289 (death/survival). The effects of explanatory variables on fish death were estimated  
290 using generalized linear mixed models (binomial family) with a logit link function  
291 and using strain identity as a random factor. Two full models differing in how they  
292 incorporated thermal performance as an explanatory variable (using either (i) PCs or  
293 (ii) TPC parameters) were used as starting models. The fixed effects used in those  
294 two initial models were:

295

(i) MLST genotype, year, location, PC1, PC2, and PC3 (49 strains)

296

(ii) MLST genotype, year, location,  $\mu_{\max}$ ,  $T_{\text{opt}}$ , and  $CT_{50/\text{high}}$  (46 strains)

297

298

299  $CT_{50/\text{low}}$  and TPB were not included in full model due to colinearity with CT high  
300 (Figure 1.).

301

302

303

304

305

306

307

308

309

310

311

312

313

314

## 312 RESULTS

313

314

### *Correlations between thermal performance curve parameters*

315

316 TPC parameters were estimated from the AIC-weighted average curves for  
317 each of the 49 strains; due to uncertainty in estimated values for some fits,  $T_{opt}$  values  
318 were calculated for 46 strains, and  $CT_{50/low}$  values for 41 strains (Supplementary  
319 Figure 1, Supplementary Table 1). A correlogram was built to explore pairwise  
320 correlations between TPC parameters (Figure 1):  $CT_{50/low}$  and  $CT_{50/high}$  were  
321 negatively correlated, suggesting a gradient between narrow and wide thermal  
322 performance range (specialist-generalist gradient).  $T_{opt}$  was positively correlated  
323 with  $CT_{50/low}$  but not with  $CT_{50/high}$ , which reflects a horizontal shift of the left-hand  
324 part of the TPC while maximum thermal tolerance would be more constrained.  
325 Finally,  $\mu_{max}$  was positively correlated with  $CT_{50/low}$  and negatively correlated with  
326  $CT_{50/high}$  and TPB; this might reflect a trade-off between increased tolerance to a  
327 larger range of temperatures and higher maximum performance.

328

### 329 *Principal components describing variation in thermal performance*

330

331 We selected the first three principal components, which accounted for 93% of  
332 the variability of the yield measurements at 17, 22, 24, 29 and 32°C (Figure 2,  
333 Supplementary Table 2). Based on the predicted TPC along each PC (Figure 2), PC1  
334 (describing 46% of the variation) is related to an increase in the thermal performance  
335 breadth by increasing yield at both extreme temperatures (17°C and 32°C) while the  
336 maximum performance is unchanged along this component. PC1 is thus mostly a  
337 generalist-specialist axis. PC2 (describing 30% of the variation) is characterized by a  
338 negative correlation between performance in cold and warm temperatures: PC2 can  
339 be seen as a cold adaptation/warm adaptation axis. PC3 (describing 17% of the  
340 variation) corresponds to a change in the maximum performance, negatively  
341 correlated with performance in the coldest temperature but unrelated to  
342 performance at the warmest temperature.

343

### 344 *Determinants of thermal performance*

345

346 The MLST genotype affected all calculated thermal performance parameters  
347 ( $\mu_{max}$ ,  $T_{opt}$ ,  $CT_{50/low}$ ,  $CT_{50/high}$  and TPB) (Table 1). Year effect was close to significance

348 for  $\mu_{\max}$ , with maximum performance decreasing slightly over the years (Table 1).

349 Geographical location had no significant effect on any TPC parameter.

350 Location had a significant effect on PC2 coordinates, with Northern strains  
351 exhibiting lower PC2 values (Table 2), corresponding to cold adaptation (Figure 2).

352 MLST genotype had a significant effect on PC3 coordinates (negative correlation  
353 between maximum performance and cold tolerance, Figure 2).

354

### 355 *Determinants of virulence*

356

357 When the effect of thermal performance on virulence was analysed using TPC  
358 parameters estimated from curve fitting, 46 strains out of 49 could be included in the  
359 analysis due to missing values in  $T_{\text{opt}}$ . Year of isolation had a positive effect on  
360 virulence (Figure 3B, Table 3).

361 Among analysed TPC parameters, only  $CT_{50/\text{high}}$  had an effect on virulence  
362 (Table 4): strains with higher tolerance to high temperatures were less virulent.

363 When the effect of thermal performance on virulence was analysed using PCs (49  
364 strains used), both year and PC1 coordinate had a significant effect on virulence:  
365 strains collected more recently were more virulent (similarly as observed using  
366 TPCs) and more generalist strains had lower virulence (Table 4, Figure 3A).

367

368

## 369 DISCUSSION

370

371 There is a growing body of evidence indicating that some pathogens become  
372 more prevalent <sup>40, 41</sup> and more virulent at warmer temperatures <sup>42</sup>. For example,  
373 increased expression of virulence factors is correlated with increased temperature in  
374 *Vibrio* species <sup>43, 44</sup>. Although global warming may increase the number of virulent  
375 pathogens, pathogens with free-living stages and ectothermic hosts are particularly  
376 susceptible to changes in temperature because temperature can have complex and  
377 opposing effects on different parts of the pathogen life cycles <sup>8</sup>. We explored if  
378 strains of an aquaculture-associated pathogen vary in their thermal performance,  
379 and if thermal performance was correlated with strain virulence. This type of  
380 information is crucial in predicting how future climate change scenarios could alter

381 environmental pathogens' virulence via correlated selection on their thermal  
382 performance. In theory, due to co-evolutionary shifts in both host and the pathogen,  
383 virulence is expected to decrease over time, as fitness of both populations is  
384 optimized. However, virulence is context-dependent, as both biotic factors such as  
385 host condition <sup>46</sup> and host density <sup>47</sup> and abiotic factors such as temperature <sup>48</sup> can  
386 influence virulence. For example, high environmental temperature could select for  
387 increased bacterial pathogenicity, in *Serratia marcescens* <sup>49</sup>.

388

389 We characterized the temperature dependency of maximum biomass  
390 production (i.e. yield) of 49 isolates of *F. columnare* that were collected from eight  
391 different areas located across Finland between 2003 and 2012. We performed  
392 temperature performance curves (TPC) and used principal component analysis on  
393 raw performance measurements to assess the variation of thermal performance  
394 between strains. Our results revealed that despite northern location Finnish *F.*  
395 *columnare* typically have a rather high optimum temperature between 23.7 °C and  
396 27.9°C and an upper critical temperature for yield between 30.1°C and 34.7 °C.  
397 Finnish lakes form predominantly closed and shallow basins (average depth about 7  
398 metres) and surface waters may reach high temperatures in summer. Tolerance to  
399 high temperature might be necessary for inhabiting natural waters during summer  
400 since this bacterium has an environmental origin <sup>50</sup>. Consistent with the idea that  
401 cold tolerance is a key element for survival and growth in high latitudes, isolates  
402 from Northern Finland were more tolerant to colder temperatures than isolates from  
403 Southern Finland (see: PC2 in Figure 2 and effect of location on PC2 in Table 2). Our  
404 findings are in agreement with previous studies showing that selection may favour  
405 higher performance in higher altitude/latitude environments to guarantee  
406 successful reproduction and transmission during short growth seasons <sup>45</sup>.

407 On the other hand, ample amount of genotype dependent variation in all TPC  
408 parameters (Table 1, Figure 1) suggests thermal performance is strongly constrained  
409 by genetic background of the bacteria. These findings clearly indicate that thermal  
410 conditions can in principle have a strong effect on the genetic diversity of *F.*  
411 *columnare* in the environment, and therefore presumably also on disease dynamics.

412 One would expect that *F. columnare* with high optimum temperatures may  
413 lead to more epidemics in the future owing to climate change. Interestingly,  
414 virulence was negatively correlated with upper thermal tolerance ( $CT_{50/high}$ ) and  
415 with thermal generalism (Tables 3 and 4). This suggests that not higher temperatures  
416 or increased fluctuations associated with climate change should not select for higher  
417 virulence in this species. However, since the  $CT_{50/high}$  values are already very high  
418 (beyond 30°C) it is unlikely that any increase in temperatures in the near future  
419 would select for changes in  $CT_{50/high}$  in the strains isolated in Finland, due to clearly  
420 lower maximum temperatures in fish farms. Furthermore, as the epidemics become  
421 more frequent at the high temperatures, recurring antibiotic treatments during onset  
422 of epidemics leave little possibility for co-selection for virulence and performance in  
423 high temperatures to take place, especially when temperatures in the farming  
424 environment rarely exceed +25°C (supplementary Figure 3).

425 Guijarro *et al.*<sup>48</sup> showed that numbers of bacterial diseases in aquaculture,  
426 particularly those of freshwater, can occur at temperatures below bacterial optimal  
427 growth (optimum growth temperature for the fastest growth under laboratory  
428 conditions). Therefore, the constraints of maximum environmental temperature on  
429 virulence should be relatively limited. This view is supported by considering  
430 outbreaks of epidemics, which start to occur at farms when water temperatures  
431 exceed ca. 18°C, after which epidemics are often treated with antibiotics.  
432 Temperature records from a fish farm in Central Finland over the past few decades  
433 show that maximum temperatures during the outbreak season have not significantly  
434 increased, but rather the overall growth season length has increased (Figure S3). Still,  
435 our results show that Finnish *F. columnare* strains have become intrinsically more  
436 virulent in recent years, as evidenced in our experiments under controlled laboratory  
437 conditions where confounding effects such as increased environmental temperature,  
438 variable nutrient availability or variable host density were removed (year effect in  
439 Table 3 and Table 4 and figure 3-B) (see also<sup>51</sup>). Thus, yearly increases in virulence  
440 could be a consequence of increased growing season, due to intensified fish farming  
441 <sup>51</sup>, or due to some other time associated change in environment.

442 We showed that maximum performance was overall negatively correlated  
443 with thermal performance breadth, suggesting a trade-off between generalism and  
444 high-performance specialism (Figure 1). However, we did not find that generalist  
445 genotypes with broader performance breadth would have lower biomass at  
446 optimum temperatures and hence opposing the classic generalist–specialist trade off  
447 hypothesis. It is noteworthy that theories are highly idealized and a "Jack of all  
448 temperatures" does not always have to be a master of none <sup>52</sup>: genotypes can have  
449 broader thermal performance range without paying a visible performance cost at  
450 optimum conditions, but possibly involving a trade-off with other traits <sup>14, 16, 54</sup>, such  
451 as virulence <sup>16, 53</sup>.

452 For environmentally growing opportunist pathogens, adaptations for more  
453 efficient exploitation of one growth environment could be expected to cause  
454 repercussions in pathogens ability for growth in the other environment <sup>7</sup>, such as  
455 host. Alternatively, the presence of virulence factors in the bacteria is unnecessary  
456 during the planktonic state but essential for the infection process, helping bacteria to  
457 save energy by not expressing virulence genes until they sense they have entered the  
458 host environment <sup>48</sup>. This could explain why more generalist strains with broader  
459 thermal performance breadth, were less virulent than more specialist ones (see: PC1  
460 effect in Table 4 and Figure 3-A). Similarly, expression of virulence factors was  
461 found to lower the outside growth rate in *Salmonella typhimurium* <sup>53</sup> and adaptation  
462 to tolerate thermal fluctuations and predators have caused lowered virulence in  
463 experimental evolution settings<sup>11, 16, 49, 55</sup>.

464 In conclusion, it seems that current problems with steadily increased severity  
465 of outbreaks and evolved virulence cannot be directly linked to increased mean  
466 temperature in fish farms and associated bacterial evolution. Still, the found clear  
467 genotype and location effects on several thermal tolerance parameters suggest that  
468 temperatures can play strong role in dictating which genotypes and clones of this  
469 important fish pathogen are successful in different thermal environments.

470

471 ACKNOWLEDGMENT

472 We would like to thank Dr. Ilkka Kronholm and Dr. Elina Laanto for providing  
473 constructive comments and help in improving the contents of this paper. We would  
474 like to thank Dr. Päivi Rintamäki, Dr. Heidi Kunttu, MSc. Reetta Penttinen and Dr.  
475 Elina Laanto for donating bacterial isolates for this study. We would also like to  
476 thank MSc Jenni Marjakangas for valuable help in the lab. The authors want to thank  
477 Yrjö Lankinen from Savon Taimen for providing the temperature data from  
478 Tyyrinvirta. This work was supported by KONE foundation (Roghaieh Ashrafi via  
479 project “Constraints of evolutionary adaptation to climate change” to Tarmo Ketola),  
480 OLVI foundation (Roghaieh Ashrafi #201620393), the Jane and Aatos Erkko  
481 Foundation (Lotta-Riina Sundberg), Finnish Cultural Foundation (Katja Pulkkinen)  
482 and Academy of Finland (Lotta-Riina Sundberg #266879, Tarmo Ketola # 278751,  
483 Jouni Taskinen # 260704 to Katja Pulkkinen) and Centre of Excellence in Biological  
484 Interactions (#252411, Prof. Johanna Mappes) to Roghaieh Ashrafi, Lotta-Riina  
485 Sundberg, and Tarmo Ketola.

#### 486 COMPETING INTERESTS

487 The authors declare no competing interests; financial or otherwise.

488

489

490

491

492

493

494

495

496

497

498

499

#### 500 REFERENCES

501

502 1. Solomon, S. *et al.* IPCC, 2007: summary for policymakers. *Climate change*, 93-129  
503 (2007).

504

505 2. Parmesan, C. Ecological and evolutionary responses to recent climate change.  
506 *Annual Review of Ecology, Evolution, and Systematics*, 637-669 (2006).

507



- 508 3. Visser, M. E. Keeping up with a warming world; assessing the rate of adaptation  
509 to climate change. *Proc. Biol. Sci.* **275**, 649-659 (2008).  
510
- 511 4. Heino, J., Virkkala, R. & Toivonen, H. Climate change and freshwater biodiversity:  
512 detected patterns, future trends and adaptations in northern regions. *Biological*  
513 *Reviews* **84**, 39-54 (2009).  
514
- 515 5. Burdon, J. & Chilvers, G. Host density as a factor in plant disease ecology. *Annu.*  
516 *Rev. Phytopathol.* **20**, 143-166 (1982).  
517
- 518 6. Coakley, S. M., Scherm, H. & Chakraborty, S. Climate change and plant disease  
519 management. *Annu. Rev. Phytopathol.* **37**, 399-426 (1999).  
520
- 521 7. Brown, S. P., Cornforth, D. M. & Mideo, N. Evolution of virulence in opportunistic  
522 pathogens: generalism, plasticity, and control. *Trends Microbiol.* **20**, 336-342 (2012).  
523
- 524 8. Harvell, C. D. *et al.* Climate warming and disease risks for terrestrial and marine  
525 biota. *Science* **296**, 2158-2162 (2002).  
526
- 527 9. Day, T. Virulence evolution via host exploitation and toxin production in  
528 spore-producing pathogens. *Ecol. Lett.* **5**, 471-476 (2002).  
529
- 530 10. Walther, B. A. & Ewald, P. W. Pathogen survival in the external environment and  
531 the evolution of virulence. *Biological Reviews* **79**, 849-869 (2004).  
532
- 533 11. Mikonranta, L., Friman, V. & Laakso, J. Life history trade-offs and relaxed  
534 selection can decrease bacterial virulence in environmental reservoirs. *PloS one* **7**,  
535 e43801 (2012).  
536
- 537 12. Sundberg, L. R., Kunttu, H. M. & Valtonen, E. T. Starvation can diversify the  
538 population structure and virulence strategies of an environmentally transmitting fish  
539 pathogen. *BMC microbiology* **14**, 1 (2014).  
540
- 541 13. Condon, C. *et al.* Indirect selection of thermal tolerance during experimental  
542 evolution of *Drosophila melanogaster*. *Ecology and evolution* **5**, 1873-1880 (2015).  
543
- 544 14. Condon, C., Cooper, B. S., Yeaman, S. & Angilletta, M. J. Temporal variation  
545 favors the evolution of generalists in experimental populations of *Drosophila*  
546 *melanogaster*. *Evolution* **68**, 720-728 (2014).  
547
- 548 15. Duncan, A. B., Fellous, S., Quillery, E. & Kaltz, O. Adaptation of *Paramecium*  
549 *caudatum* to variable conditions of temperature stress. *Res. Microbiol.* **162**, 939-944  
550 (2011).  
551
- 552 16. Ketola, T. *et al.* Fluctuating temperature leads to evolution of thermal generalism  
553 and preadaptation to novel environments. *Evolution* **67**, 2936-2944 (2013).

554

555 17. Levins, R. in *Evolution in changing environments: some theoretical explorations*  
556 (Princeton University Press, 1968).

557

558 18. Kassen, R. The experimental evolution of specialists, generalists, and the  
559 maintenance of diversity. *J. Evol. Biol.* **15**, 173-190 (2002).

560

561 19. Declercq, A. M., Haesebrouck, F., Van den Broeck, W., Bossier, P. & Decostere, A.  
562 Columnaris disease in fish: a review with emphasis on bacterium-host interactions.  
563 *Vet. Res.* **44**, 27-44 (2013).

564

565 20. Bernardet, J. & Grimont, P. A. Deoxyribonucleic acid relatedness and phenotypic  
566 characterization of *Flexibacter columnaris* sp. nov., nom. rev., *Flexibacter psychrophilus*  
567 sp. nov., nom. rev., and *Flexibacter maritimus* Wakabayashi, Hikida, and Masumura  
568 1986. *Int. J. Syst. Bacteriol.* **39**, 346-354 (1989).

569

570 21. Schneck, J. & Caslake, L. Genetic diversity of *Flavobacterium columnare* isolated  
571 from fish collected from warm and cold water. *J. Fish Dis.* **29**, 245-248 (2006).

572

573 22. Karvonen, A., Rintamäki, P., Jokela, J. & Valtonen, E. T. Increasing water  
574 temperature and disease risks in aquatic systems: climate change increases the risk  
575 of some, but not all, diseases. *Int. J. Parasitol.* **40**, 1483-1488 (2010).

576

577 23. Pulkkinen, K. *et al.* Intensive fish farming and the evolution of pathogen  
578 virulence: the case of columnaris disease in Finland. *Proc. Biol. Sci.* **277**, 593-600  
579 (2010).

580

581 24. Ruosteenoja, K., Jylhä, K. & Kämäräinen, M. Climate Projections for Finland  
582 under the RCP Forcing Scenarios. *Geophysica* **51**, 17-50 (2016).

583

584 25. Sinclair, B. J. *et al.* Can we predict ectotherm responses to climate change using  
585 thermal performance curves and body temperatures? *Ecol. Lett.* **19**, 1372-1385 (2016).

586

587 26. Huey, R. B., Berrigan, D., Gilchrist, G. W. & Herron, J. C. Testing the adaptive  
588 significance of acclimation: a strong inference approach. *Am. Zool.* **39**, 323-336 (1999).

589

590 27. Ketola, T. & Saarinen, K. Experimental evolution in fluctuating environments:  
591 tolerance measurements at constant temperatures incorrectly predict the ability to  
592 tolerate fluctuating temperatures. *J. Evol. Biol.* **28**, 800-806 (2015).

593

594 28. Scheiner, S. M. & Yampolsky, L. Y. The evolution of *Daphnia pulex* in a temporally  
595 varying environment. *Genet. Res.* **72**, 25-37 (1998).

596

597 29. Huey, R. B. & Kingsolver, J. G. Evolution of thermal sensitivity of ectotherm  
598 performance. *Trends in Ecology & Evolution* **4**, 131-135 (1989).

599

- 600 30. Izem, R. & Kingsolver, J. G. Variation in continuous reaction norms: quantifying  
601 directions of biological interest. *Am. Nat.* **166**, 277-289 (2005).  
602
- 603 31. Ashrafi, R., Pulkkinen, K., Sundberg, L., Pekkala, N. & Ketola, T. A multilocus  
604 sequence analysis scheme for characterization of *Flavobacterium columnare* isolates.  
605 *BMC microbiology* **15**, 243 (2015).  
606
- 607 32. Suomalainen, L., Kunttu, H., Valtonen, E., Hirvela-Koski, V. & Tirola, M.  
608 Molecular diversity and growth features of *Flavobacterium columnare* strains isolated  
609 in Finland. *Dis. Aquat. Org.* **70**, 55-61 (2006).  
610
- 611 33. Song, Y., Fryer, J. & Rohovec, J. Comparison of six media for the cultivation of  
612 *Flexibacter columnaris*. *Fish Pathol.* **23**, 91-94 (1988).  
613
- 614 34. Decostere, A., Haesebrouck, F. & Devriese, L. A. Shieh medium supplemented  
615 with tobramycin for selective isolation of *Flavobacterium columnare* (*Flexibacter*  
616 *columnaris*) from diseased fish. *J. Clin. Microbiol.* **35**, 322-324 (1997).  
617
- 618 35. Anaker, R. L. & Ordal, E. J. Studies on the myxobacterium *Chondrococcus*  
619 *columnaris*. I. Serological typing. *J. Bacteriol.* **78**, 25-32 (1959).  
620
- 621 36. Duetz, W. A. *et al.* Methods for intense aeration, growth, storage, and replication  
622 of bacterial strains in microtiter plates. *Appl. Environ. Microbiol.* **66**, 2641-2646 (2000).  
623
- 624 37. Kinnula, H., Mappes, J., Valkonen, J. K. & Sundberg, L. The Influence of Infective  
625 Dose on the Virulence of a Generalist Pathogen in Rainbow Trout (*Oncorhynchus*  
626 *mykiss*) and Zebra Fish (*Danio rerio*). *PloS one* **10**, e0139378 (2015).  
627
- 628 38. Laanto, E., Penttinen, R. K., Bamford, J. K. & Sundberg, L. Comparing the  
629 different morphotypes of a fish pathogen-implications for key virulence factors in  
630 *Flavobacterium columnare*. *BMC microbiology* **14**, 170 (2014).  
631
- 632 39. Hartig. DHARMA: Residual Diagnostics for Hierarchical (Multi-Level/Mixed)  
633 Regression Models. R package version 0.1.2. [https://CRAN.R-](https://CRAN.R-project.org/package=DHARMA)  
634 [project.org/package=DHARMA](https://CRAN.R-project.org/package=DHARMA), (last Accessed November 2016). (2016).  
635
- 636 40. Chiaramonte, L., Munson, D. & Trushenski, J. Climate Change and  
637 Considerations for Fish Health and Fish Health Professionals. *Fisheries* **41**, 396-399  
638 (2016).  
639
- 640 41. Sterud, E. *et al.* Severe mortality in wild Atlantic salmon *Salmo salar* due to  
641 proliferative kidney disease (PKD) caused by *Tetracapsuloides bryosalmonae* (Myxozoa).  
642 *Dis. Aquat. Org.* **77**, 191-198 (2007).  
643
- 644 42. Smith, K. F. *et al.* Global rise in human infectious disease outbreaks. *J. R. Soc.*  
645 *Interface* **11**, 20140950 (2014).

646

647 43. Mahoney, J. C., Gerding, M. J., Jones, S. H. & Whistler, C. A. Comparison of the  
648 pathogenic potentials of environmental and clinical vibrio parahaemolyticus strains  
649 indicates a role for temperature regulation in virulence. *Appl. Environ. Microbiol.* **76**,  
650 7459-7465 (2010).

651

652 44. Oh, M. H., Lee, S. M., Lee, D. H. & Choi, S. H. Regulation of the *Vibrio vulnificus*  
653 hupA gene by temperature alteration and cyclic AMP receptor protein and  
654 evaluation of its role in virulence. *Infect. Immun.* **77**, 1208-1215 (2009).

655

656 45. Yang, L. *et al.* Trade-offs and evolution of thermal adaptation in the Irish potato  
657 famine pathogen *Phytophthora infestans*. *Mol. Ecol.* (2016).

658

659 46. Pulkkinen, K. & Ebert, D. Host starvation decreases parasite load and mean host  
660 size in experimental populations. *Ecology* **85**, 823-833 (2004).

661

662 47. Bieger, A. & Ebert, D. Expression of parasite virulence at different host  
663 population densities under natural conditions. *Oecologia* **160**, 247-255 (2009).

664

665 48. Guijarro, J. A., Cascales, D., García-Torrico, A. I., García-Domínguez, M. &  
666 Méndez, J. Temperature-dependent expression of virulence genes in fish-pathogenic  
667 bacteria. *Frontiers in microbiology* **6** (2015).

668

669 49. Friman, V. *et al.* High temperature and bacteriophages can indirectly select for  
670 bacterial pathogenicity in environmental reservoirs. *PloS one* **6**, e17651 (2011).

671

672 50. Kunttu, H. M., Sundberg, L. R., Pulkkinen, K., & Valtonen, E. T. Environment  
673 may be the source of *Flavobacterium columnare* outbreaks at fish farms. *Environmental*  
674 *microbiology reports*, **4**(4), 398-402 (2012).

675

676 51. Sundberg, L. R. *et al.* Intensive aquaculture selects for increased virulence and  
677 interference competition in bacteria. *Proc. Biol. Sci.* **283**, 20153069 (2016).

678

679 52. Angilletta, M. J. in *Thermal adaptation: a theoretical and empirical synthesis* (Oxford  
680 University Press, 2009).

681

682

683 53. Sturm, A. *et al.* The cost of virulence: retarded growth of *Salmonella Typhimurium*  
684 cells expressing type III secretion system 1. *PLoS Pathog* **7**, e1002143 (2011).

685

686 54. Huey, R. B. & Hertz, P. E. Is a jack-of-all-temperatures a master of none?  
687 *Evolution* **38**, 441-444 (1984).

688

689 55. Zhang, J. *et al.* Association of colony morphotypes with virulence, growth and  
690 resistance against protozoan predation in the fish pathogen *Flavobacterium columnare*.  
691 *FEMS Microbiology Ecology*. **89**: 553-562 (2014).

692

693

694

695

696

697

698

699

700

701

702

703

704

705

706

707

708

709

710

711

712

713

714

715

716

717

718

719

720

721

722

723

724

725

726

727

728

729

730

731

732

733

734

735

736

737

738

739 FIGURES AND TABLES:

740

741 **Figure 1. Correlogram for thermal performance parameter estimates.** Upper  
742 triangle, Pearson's product moment correlation coefficients between pairs of  
743 variables. The numbers in brackets indicate the 95% confidence interval. Lower  
744 triangle, scatter plot between pairs of variables. When the Pearson's product moment  
745 correlation coefficient is significant ( $p$ -value  $< 0.05$ ), a dashed line indicates the  
746 ranked major axis. For the upper triangle, the color coding on a green to red scale  
747 matches the correlation coefficient value (-1, green; 0, grey; +1, red). For the lower  
748 triangle, colors match MLST genotype: red, purple, green, and blue are for  
749 genotypes C, E, G and A&H, respectively.

750

751 **Figure 2. PCA results and their interpretation in terms of TPC patterns.** Upper  
752 panels, prediction of TPC variation patterns along each of the first three PCs. Grey  
753 dashed line, average performance curve of the 49 strains used in this study. Orange  
754 and green lines, performance curves of hypothetical strains with coordinates at the  
755 lower and upper 95% quantiles, respectively, along each PC, as depicted in the  
756 explicative panel on the right. Lower panels, loadings for each original temperature  
757 on the first three PCs.

758

759 **Figure 3. Effect of PC1 coordinate and year of collection on strain virulence.** Each  
760 marker represents the average mortality observed for a given strain. Fitted curves  
761 are plotted using the GLMM results presented in Table 4. Colours represent  
762 genotype groups. The black fitted line correspond weight-averaged fixed effect  
763 estimates based on the abundance of genotype groups in our dataset. Panel A, effect  
764 of PC1 coordinate on strain virulence. The three sub-panels illustrate how TPC  
765 varies from specialist to generalist phenotype along PC1. Panel B, effect of year of  
766 collection on strain virulence.

767

768

769

770

771 **Table 1. Effect of MLST genotype, year of collection and location on strain**  
 772 **thermal performance estimates.** Marginal means are reported for each level of the  
 773 qualitative variables (Genotype, Location) and slope is reported for the continuous  
 774 variable Year. For variables which were removed from the final model, the reported  
 775 values (in italics) are the ones obtained in the last step before they were removed  
 776 during model selection.

|                               | Estimate      | Std error    | F-value        | (df1, df2)     | P-value          |
|-------------------------------|---------------|--------------|----------------|----------------|------------------|
| <b><math>\mu_{max}</math></b> |               |              |                |                |                  |
| <b>Genotype</b>               |               |              | <b>18.7779</b> | <b>(3, 44)</b> | <b>&lt;0.001</b> |
| C                             | 1.091         | 0.012        |                |                |                  |
| E                             | 0.993         | 0.015        |                |                |                  |
| G                             | 1.044         | 0.028        |                |                |                  |
| A&H                           | 0.922         | 0.025        |                |                |                  |
| <i>Location</i>               |               |              | <i>1.8084</i>  | <i>(1, 43)</i> | <i>0.186</i>     |
| Northern                      | <i>1.035</i>  | <i>0.020</i> |                |                |                  |
| Southern                      | <i>1.004</i>  | <i>0.012</i> |                |                |                  |
| <b>Year</b>                   | -0.007        | 0.004        | 3.6614         | (1, 44)        | 0.062            |
| <b>Topt</b>                   |               |              |                |                |                  |
| <b>Genotype</b>               |               |              | <b>3.2075</b>  | <b>(3, 42)</b> | <b>0.033</b>     |
| C                             | 26.118        | 0.164        |                |                |                  |
| E                             | 25.762        | 0.184        |                |                |                  |
| G                             | 24.922        | 0.367        |                |                |                  |
| A&H                           | 25.660        | 0.300        |                |                |                  |
| <i>Location</i>               |               |              | <i>0.6578</i>  | <i>(1, 41)</i> | <i>0.422</i>     |
| Northern                      | <i>25.427</i> | <i>0.269</i> |                |                |                  |
| Southern                      | <i>25.681</i> | <i>0.157</i> |                |                |                  |
| <b>Year</b>                   | -0.028        | 0.050        | 0.3254         | (1, 40)        | 0.572            |
| <b>CTlow</b>                  |               |              |                |                |                  |
| <b>Genotype</b>               |               |              | <b>5.2715</b>  | <b>(3, 37)</b> | <b>0.004</b>     |
| C                             | 17.577        | 0.178        |                |                |                  |
| E                             | 16.511        | 0.212        |                |                |                  |
| G                             | 17.028        | 0.397        |                |                |                  |
| A&H                           | 16.668        | 0.459        |                |                |                  |
| <i>Location</i>               |               |              | <i>0.2220</i>  | <i>(1, 35)</i> | <i>0.640</i>     |
| Northern                      | <i>16.864</i> | <i>0.320</i> |                |                |                  |
| Southern                      | <i>17.036</i> | <i>0.199</i> |                |                |                  |
| <b>Year</b>                   | 0.057         | 0.055        | 1.0523         | (1, 36)        | 0.312            |
| <b>CThigh</b>                 |               |              |                |                |                  |
| <b>Genotype</b>               |               |              | <b>7.3380</b>  | <b>(3, 45)</b> | <b>&lt;0.001</b> |
| C                             | 31.570        | 0.167        |                |                |                  |
| E                             | 32.471        | 0.200        |                |                |                  |
| G                             | 31.107        | 0.400        |                |                |                  |
| A&H                           | 32.722        | 0.326        |                |                |                  |
| <i>Location</i>               |               |              | <i>0.5217</i>  | <i>(1, 44)</i> | <i>0.474</i>     |
| Northern                      | <i>32.144</i> | <i>0.285</i> |                |                |                  |
| Southern                      | <i>31.903</i> | <i>0.171</i> |                |                |                  |
| <b>Year</b>                   | 0.005         | 0.054        | 0.0093         | (1, 43)        | 0.924            |
| <b>TPB</b>                    |               |              |                |                |                  |
| <b>Genotype</b>               |               |              | <b>7.8427</b>  | <b>(3, 37)</b> | <b>&lt;0.001</b> |
| C                             | 13.994        | 0.275        |                |                |                  |
| E                             | 15.970        | 0.328        |                |                |                  |
| G                             | 14.079        | 0.614        |                |                |                  |
| A&H                           | 15.437        | 0.709        |                |                |                  |
| <i>Location</i>               |               |              | <i>0.4048</i>  | <i>(1, 35)</i> | <i>0.529</i>     |
| Northern                      | <i>15.080</i> | <i>0.496</i> |                |                |                  |
| Southern                      | <i>14.721</i> | <i>0.308</i> |                |                |                  |
| <b>Year</b>                   | -0.069        | 0.086        | 0.6543         | (1, 36)        | 0.424            |

778 **Table 2. Effect of MLST genotype, year of collection and location on strain**  
 779 **coordinates along PCs.** Marginal means are reported for each level of the qualitative  
 780 variables (Genotype, Location) and slope is reported for the continuous variable  
 781 Year. For variables, which were removed from the final model, the reported values  
 782 (in italics) are the ones obtained in the last step before they were removed during  
 783 model selection.

|                 | Estimate | Std error | F-value | (df1, df2) | P-value |
|-----------------|----------|-----------|---------|------------|---------|
| <b>PC1</b>      |          |           |         |            |         |
| <i>Genotype</i> |          |           | 1.3983  | (3, 45)    | 0.256   |
| C               | -0.006   | 0.040     |         |            |         |
| E               | 0.063    | 0.048     |         |            |         |
| G               | -0.123   | 0.097     |         |            |         |
| A&H             | 0.091    | 0.079     |         |            |         |
| <i>Location</i> |          |           | 2.1451  | (1, 44)    | 0.150   |
| Northern        | 0.092    | 0.068     |         |            |         |
| Southern        | -0.025   | 0.041     |         |            |         |
| <i>Year</i>     |          |           | 0.1342  | (1, 43)    | 0.716   |
|                 | -0.005   | 0.013     |         |            |         |
| <b>PC2</b>      |          |           |         |            |         |
| <i>Genotype</i> |          |           | 0.8297  | (3, 43)    | 0.485   |
| C               | -0.030   | 0.040     |         |            |         |
| E               | -0.037   | 0.059     |         |            |         |
| G               | -0.146   | 0.093     |         |            |         |
| A&H             | 0.038    | 0.079     |         |            |         |
| <b>Location</b> |          |           | 6.1481  | (1, 47)    | 0.017   |
| Northern        | -0.094   | 0.039     |         |            |         |
| Southern        | 0.030    | 0.031     |         |            |         |
| <i>Year</i>     |          |           | 0.8896  | (1, 46)    | 0.351   |
|                 | 0.009    | 0.010     |         |            |         |
| <b>PC3</b>      |          |           |         |            |         |
| <b>Genotype</b> |          |           | 9.8268  | (3, 45)    | <0.001  |
| C               | -0.060   | 0.018     |         |            |         |
| E               | 0.051    | 0.021     |         |            |         |
| G               | 0.002    | 0.042     |         |            |         |
| A&H             | 0.120    | 0.034     |         |            |         |
| <i>Location</i> |          |           | 1.6877  | (1, 44)    | 0.201   |
| Northern        | -0.005   | 0.030     |         |            |         |
| Southern        | 0.040    | 0.018     |         |            |         |
| <i>Year</i>     |          |           | 1.2299  | (1, 43)    | 0.274   |
|                 | 0.006    | 0.006     |         |            |         |

806  
807  
808  
809



810 **Table 3. Effect of strain characteristics on virulence (using PCs coordinates).**  
 811 Model used in R: death ~ genotype + year + location + PC1 + PC2 + PC3 + (1 | strain),  
 812 with a binomial family distribution and a logit link function. Marginal means and  
 813 standard errors are reported for each different level of qualitative variables  
 814 (Genotype and Location) in the original response scale (pDeath) while slope  
 815 estimates and standard errors in the logit scale are reported for the continuous  
 816 variables. For variables which were removed from the final model, the reported  
 817 values (in italics) are the ones obtained in the last step before they were removed  
 818 during model selection.

819

820

|                 | Estimate            | Std error    | Chi-square    | Df       | P-value      |
|-----------------|---------------------|--------------|---------------|----------|--------------|
| <b>Genotype</b> |                     |              | 4.4056        | 3        | 0.221        |
| C               | Pdeath=0.665        | 0.327        |               |          |              |
| E               | Pdeath=0.907        | 0.135        |               |          |              |
| G               | Pdeath=0.203        | 0.424        |               |          |              |
| A&H             | Pdeath=1.000        | 0.001        |               |          |              |
| <i>Location</i> |                     |              | <i>0.0303</i> | <i>1</i> | <i>0.862</i> |
| <i>Northern</i> | <i>Pdeath=0.945</i> | <i>0.098</i> |               |          |              |
| <i>Southern</i> | <i>Pdeath=0.923</i> | <i>0.083</i> |               |          |              |
| <b>Year</b>     |                     |              | 4.3022        | 1        | <b>0.038</b> |
|                 | 2.366               | 1.141        |               |          |              |
| <b>µmax</b>     |                     |              | 0.4359        | 1        | 0.509        |
|                 | 0.765               | 1.159        |               |          |              |
| <b>Topt</b>     |                     |              | 3.6112        | 1        | 0.057        |
|                 | 1.765               | 0.929        |               |          |              |
| <b>CThigh</b>   |                     |              | <b>4.4010</b> | <b>1</b> | <b>0.036</b> |
|                 | -2.588              | 1.234        |               |          |              |

827

828

829

830

831

832

833

834 **Table 4. Effect of strain characteristics on virulence (using TPC estimates).** Model  
 835 used in R:  $\text{death} \sim \text{genotype} + \text{year} + \text{location} + \mu_{\text{max}} + \text{Topt} + \text{Topt2} + \text{CT50/low} +$   
 836  $\text{CT50/high} + (1 | \text{strain})$ , with a binomial family distribution and a logit link function.  
 837 Continuous variables (Year,  $\mu_{\text{max}}$ , Topt, Topt2, CT50/low, CT50/high) were z-  
 838 normalised. Marginal means and standard errors are reported for each different  
 839 level of qualitative variables (Genotype and Location) in the original response scale  
 840 (pDeath) while slope estimates and standard errors in the logit scale are reported for  
 841 the continuous variables. For variables which were removed from the final model,  
 842 the reported values (in italics) are the ones obtained in the last step before they were  
 843 removed during model selection.

844

845

|                 | Estimate            | Std error    | Chi-square    | Df       | P-value      |
|-----------------|---------------------|--------------|---------------|----------|--------------|
| <b>Genotype</b> |                     |              | 7.1680        | 3        | 0.067        |
| C               | Pdeath=0.844        | 0.155        |               |          |              |
| E               | Pdeath=0.918        | 0.122        |               |          |              |
| G               | Pdeath=0.068        | 0.148        |               |          |              |
| A&H             | Pdeath=1.000        | 0.001        |               |          |              |
| <i>Location</i> |                     |              | <i>0.2278</i> | <i>1</i> | <i>0.633</i> |
| <i>Northern</i> | <i>Pdeath=0.835</i> | <i>0.234</i> |               |          |              |
| <i>Southern</i> | <i>Pdeath=0.932</i> | <i>0.075</i> |               |          |              |
| <b>Year</b>     |                     |              | <b>5.0896</b> | <b>1</b> | <b>0.024</b> |
|                 | 1.944               | 0.862        |               |          |              |
| <b>PC1</b>      |                     |              | <b>5.0548</b> | <b>1</b> | <b>0.025</b> |
|                 | 1.935               | 0.861        |               |          |              |
| <b>PC2</b>      |                     |              | 2.5536        | 1        | 0.110        |
|                 | -1.351              | 0.846        |               |          |              |
| <b>PC3</b>      |                     |              | 2.4667        | 1        | 0.116        |
|                 | -1.492              | 0.950        |               |          |              |

855

856

857

858

859

860

861

862

863

864

865 SUPPLEMENTARY MATERIAL

866

867 **Sup. Figure S1. TPC fits.** Each plot represents maximum yield (y-axis) versus  
868 temperature (x-axis). The strain name is indicated in each panel. For each strain, the  
869 six candidate equations from TableCurve 2D were fitted (grey lines) and the  
870 resulting curves were averaged using AIC-weights (red lines). Thermal performance  
871 parameters (maximum yield, optimum temperature,  $CT_{50/low}$  and  $CT_{50/high}$ ) were  
872 determined from the average curve for each strain. Asterisks denote strains for  
873 which estimated values for either  $CT_{50/low}$  alone (\*) or  $CT_{50/low}$  and  $T_{opt}$  (\*\*) were  
874 deemed too unreliable and were set as missing values in downstream analyses.

875

876 **Sup. Figure S2. Evolution of seasonal variation in water temperature in a Finnish**  
877 **fish farm (Tyyrinvirta fish farm).** The graphs show the evolution of (A) monthly  
878 average temperatures, (B) averages of three highest temperatures per month and (C)  
879 averages of three lowest temperatures per month. Red lines are fitted using a linear  
880 model within each month. The p-value for the significance of the year effect on the  
881 monthly values is reported for each month.

882

883 **Sup. Table S1. Strain information.** Site, year of isolation, source of isolation (fish or  
884 water), location of isolation, host species, sequence type (ST), genotype, maximum  
885 biomass (yield) estimates ( $\mu_{max}$ ), optimal temperature ( $T_{opt}$ ), lower critical  
886 temperature ( $CT_{min}$ : this study  $CT_{50/low}$ ), upper critical temperature ( $CT_{max}$ : this  
887 study  $CT_{50/high}$ ), thermal performance breadth (TPB) and mortality percentage  
888 estimates for the 49 *F. columnare* strains from Finland.

889

890 **Sup. Table S2. PCA summary.** The first five rows describe the matrix of loading.

$\mu_{\max}$ 0.24  
(-0.05,0.50)0.40  
(0.10,0.63)-0.37  
(-0.59,-0.10)-0.46  
(-0.67,-0.17) $T_{\text{opt}}$ 0.34  
(0.04,0.59)0.07  
(-0.22,0.35)-0.02  
(-0.32,0.29) $CT_{50/\text{low}}$ -0.39  
(-0.62,-0.09)-0.84  
(-0.91,-0.71) $CT_{50/\text{high}}$ 0.83  
(0.70,0.91)

TPB

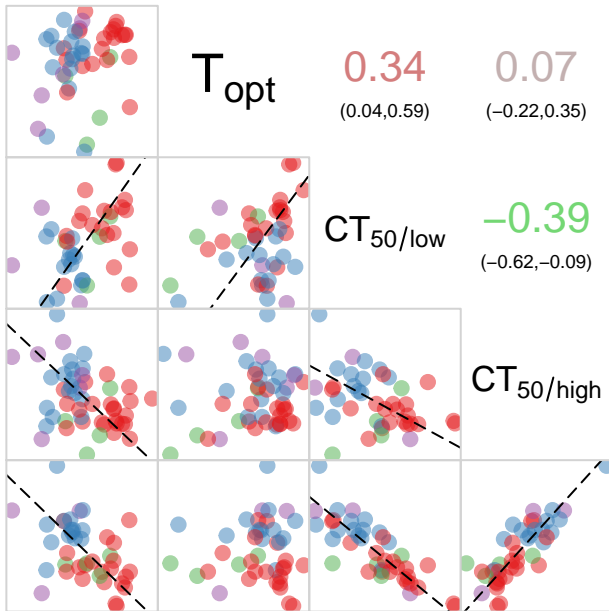

**PC1: 46% var****PC2: 30% var****PC3: 17% var**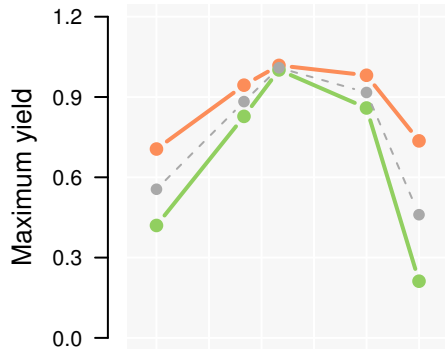*(generalist vs. specialist)*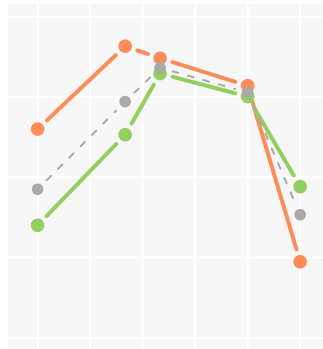*(cold- vs. warm-adapted)*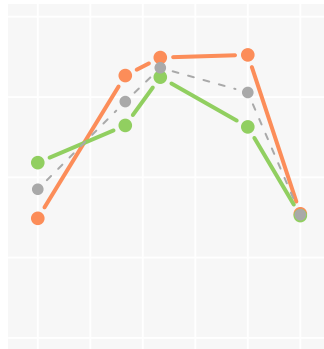*(trade-off max. perf. vs. cold adaptation)*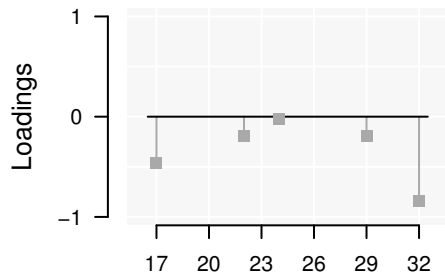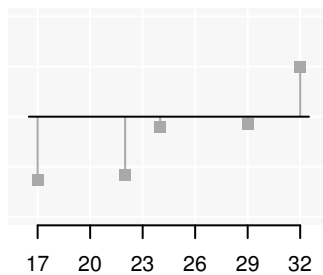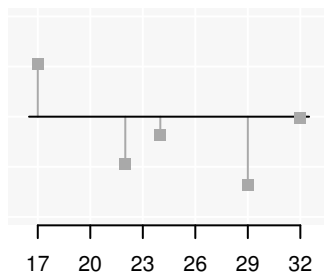

Legend for maximum yield trajectories along PCs (e.g. along PC1)

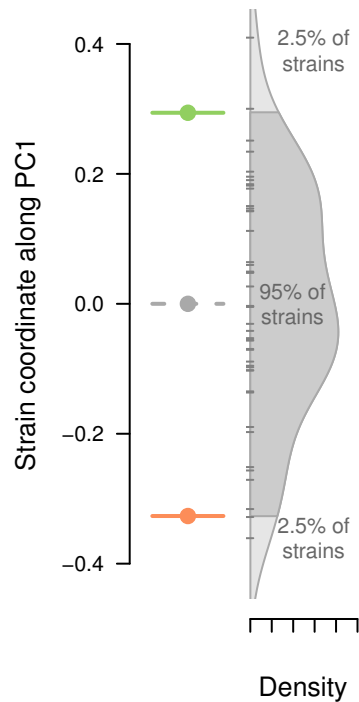

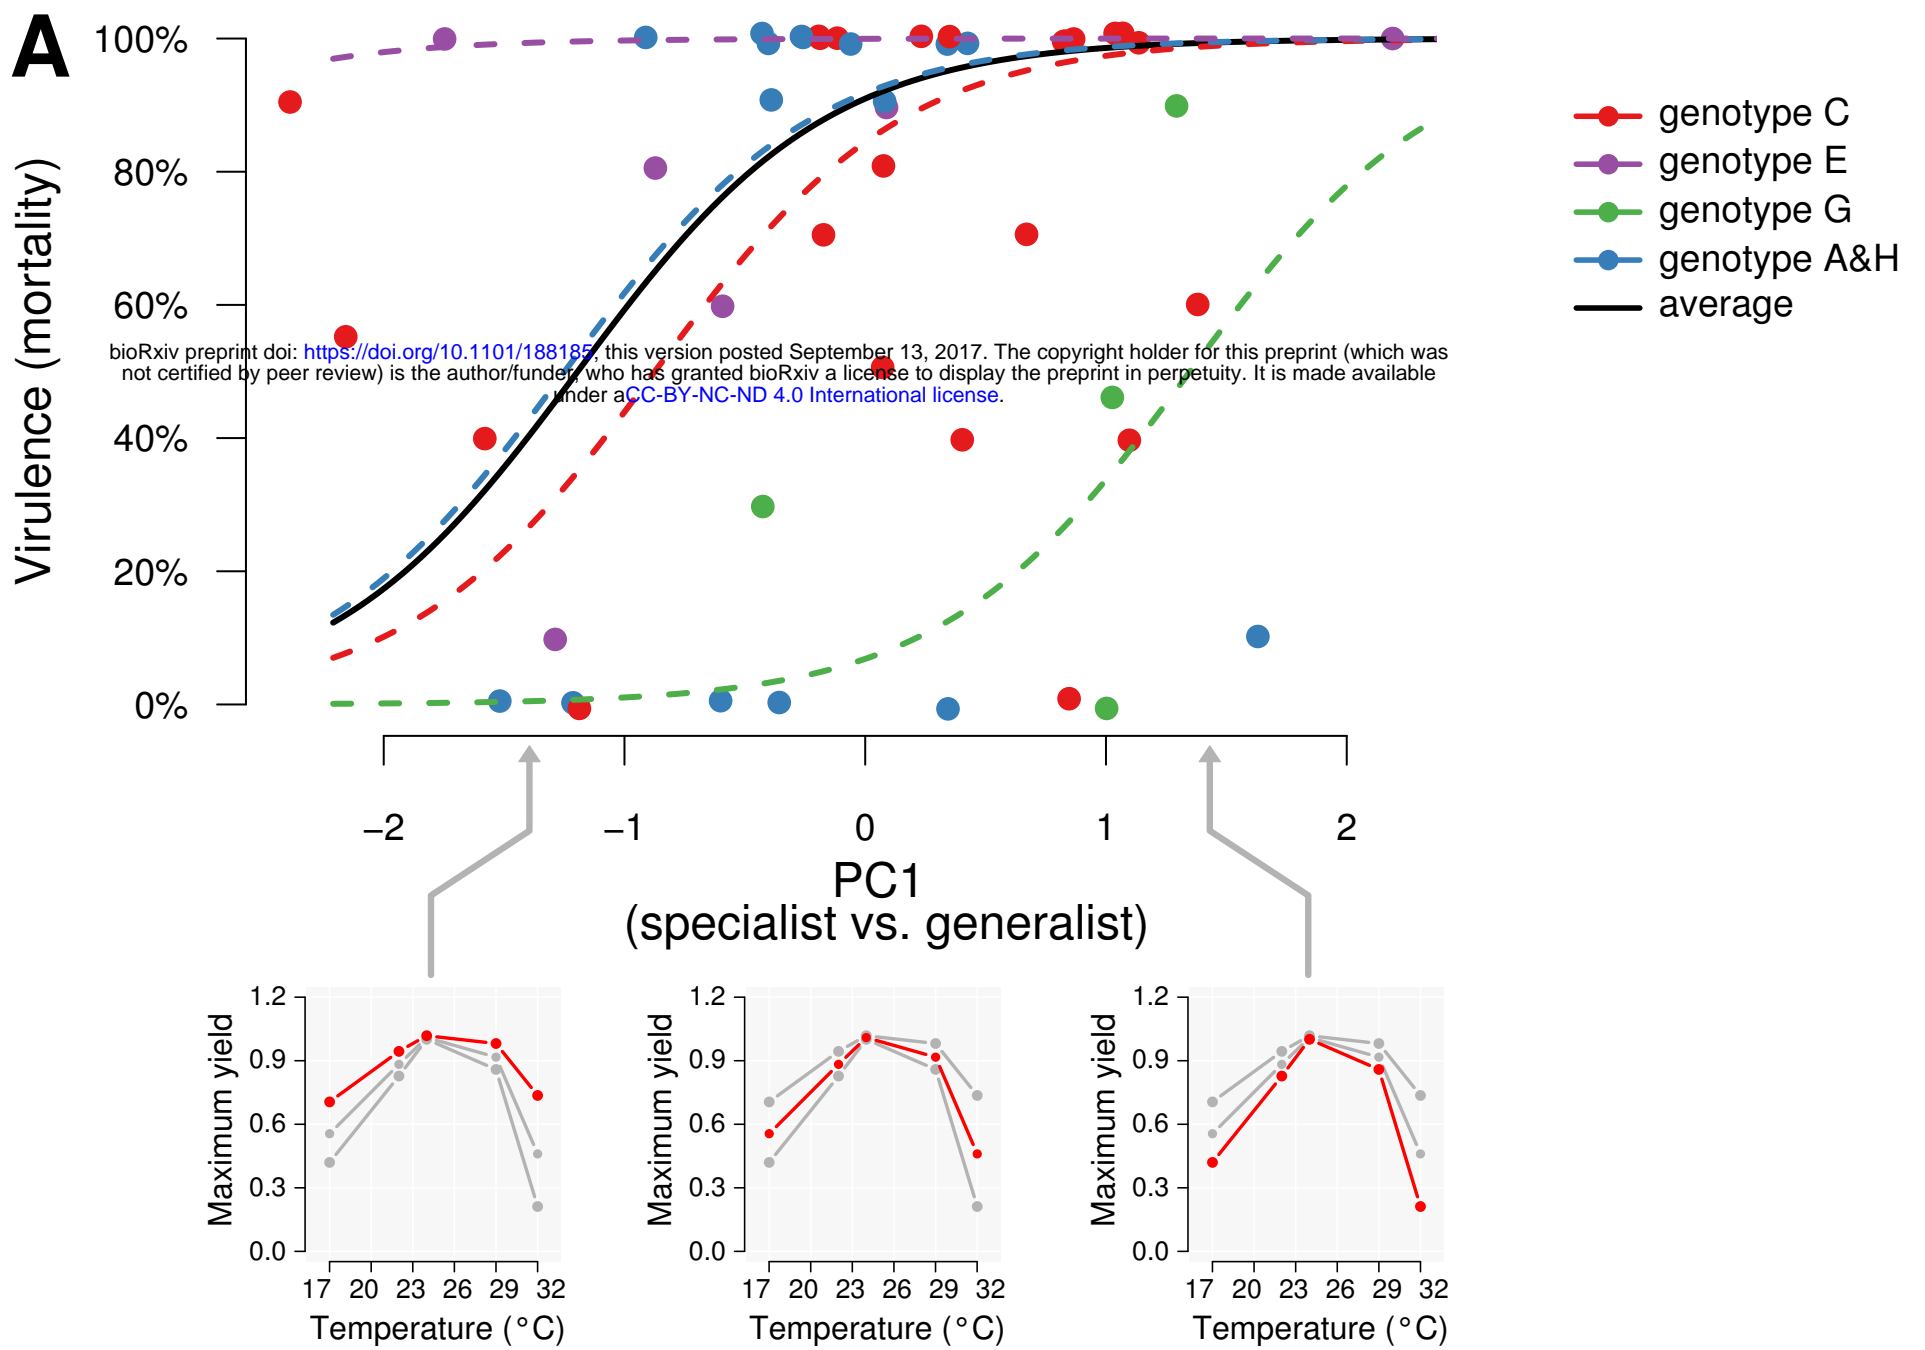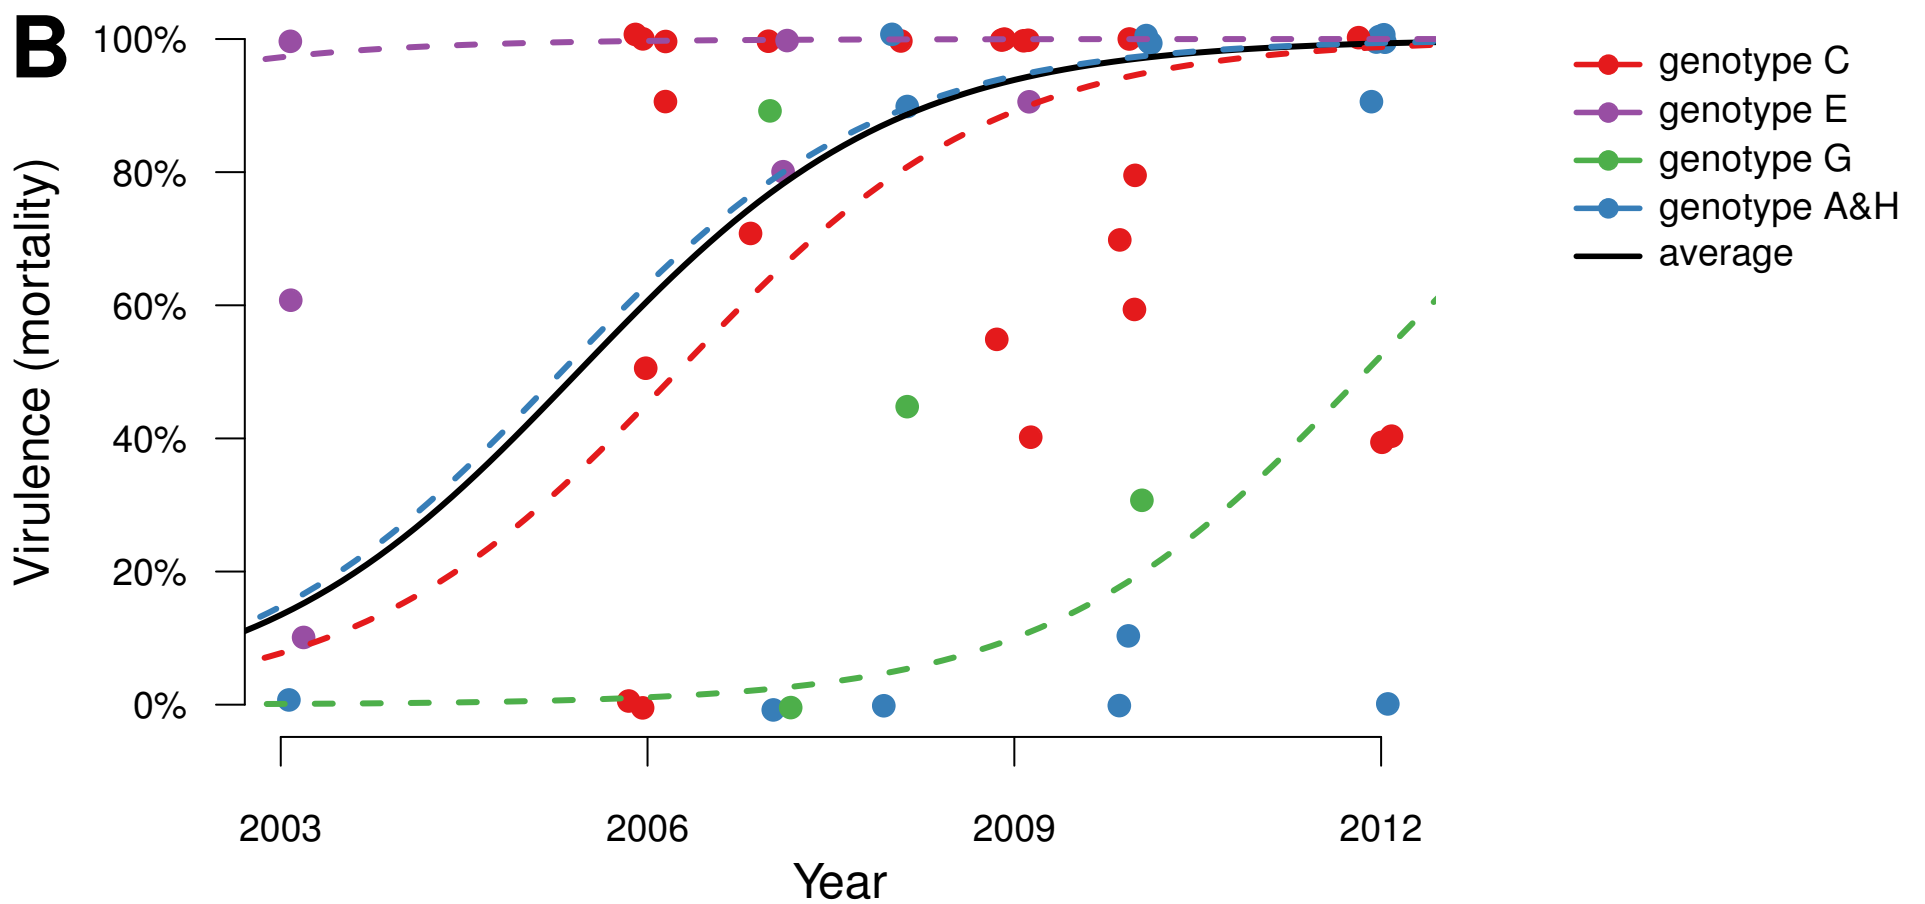

Source: https://www.biorxiv.org/content/10.1101/188185v1.full.pdf
